# Supplementary material
Source: Elsevier journal article supplement (https://arts.units.it/retrieve/e2913fdf-9de3-f688-e053-3705fe0a67e0/mmc1.pdf)
Supplement: mmc1 [file mmc1.pdf]

# SUPPLEMENTARY MATERIALS

## Table of Contents

|                                             |             |
|---------------------------------------------|-------------|
| <b>1. Supplementary Figure Legends.....</b> | <b>p. 2</b> |
| <b>2. Supplementary Figures.....</b>        | <b>p. 3</b> |
| <b>3. Supplementary Tables.....</b>         | <b>p. 5</b> |

## **Figure Legends.**

**Figure 1S.** Forest plot shows the impact of chronic RASI therapy on in-hospital (panel A) and 30-day (panel B) mortality in patients grouped according to quartiles of the propensity score.

**Figure 2S.** Forest plot shows the impact of in-hospital RASI therapy on in-hospital (panel A) and 30-day (panel b) mortality in patients grouped according to quartiles of the propensity score.

**Figure 1S**

**A**

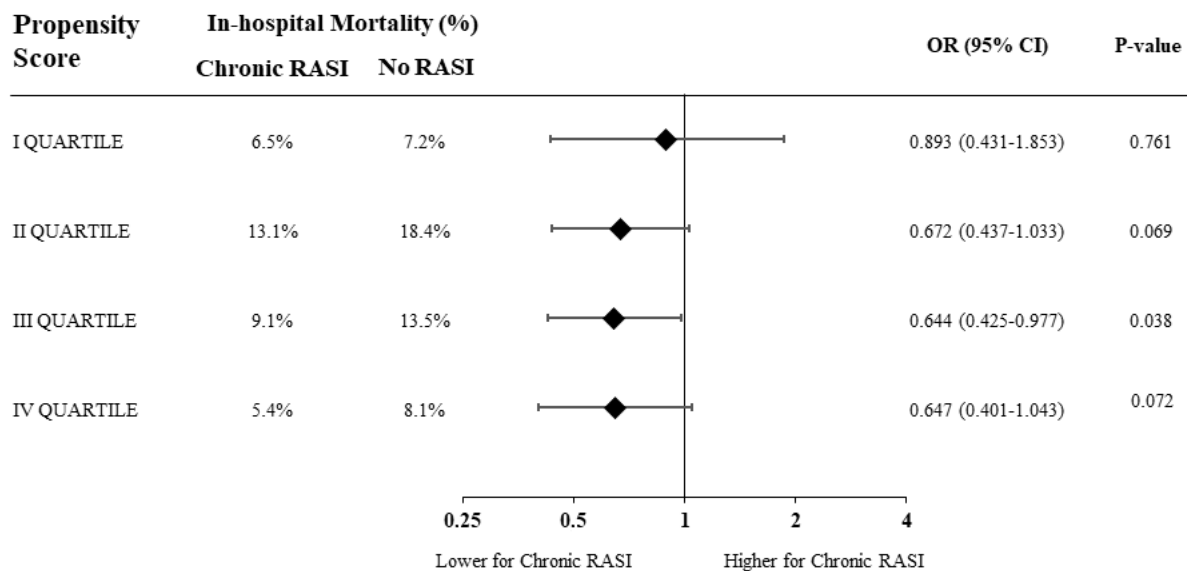

**B**

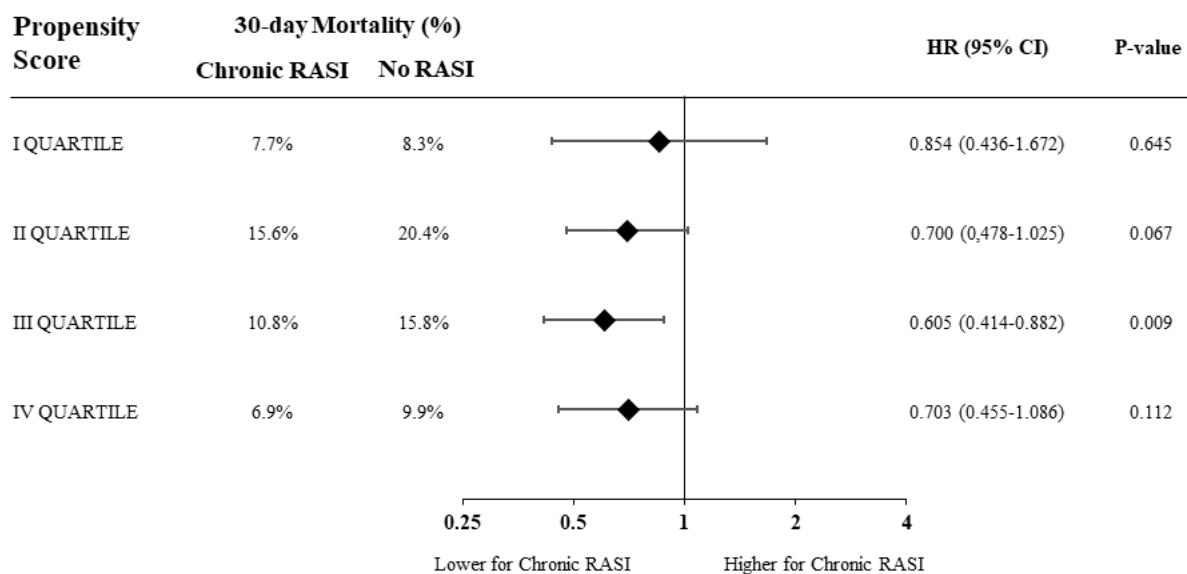

**Figure 2S**

**A**

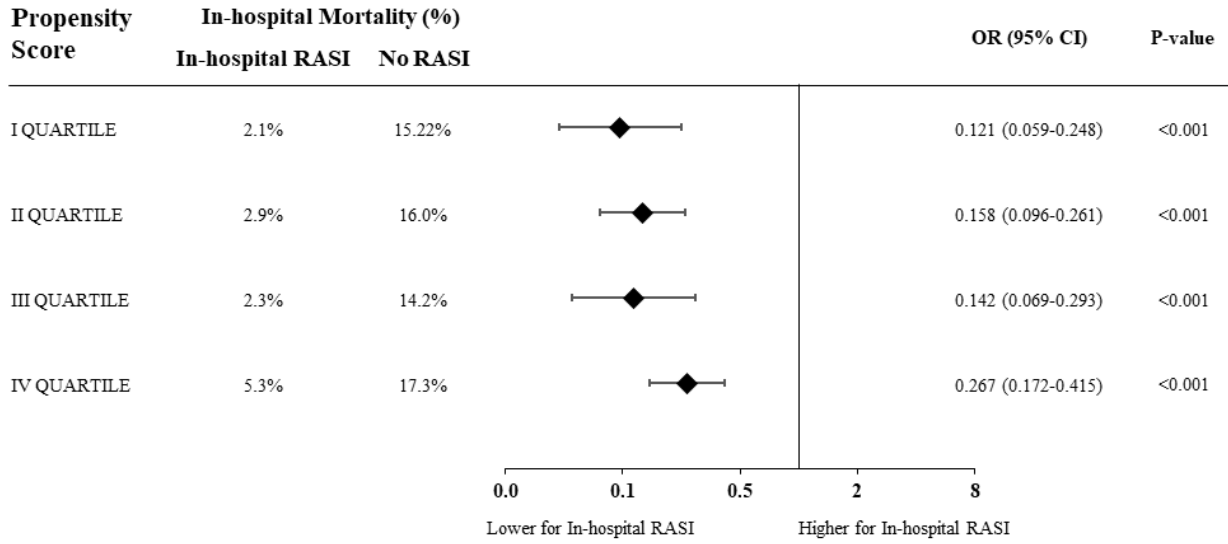

**B**

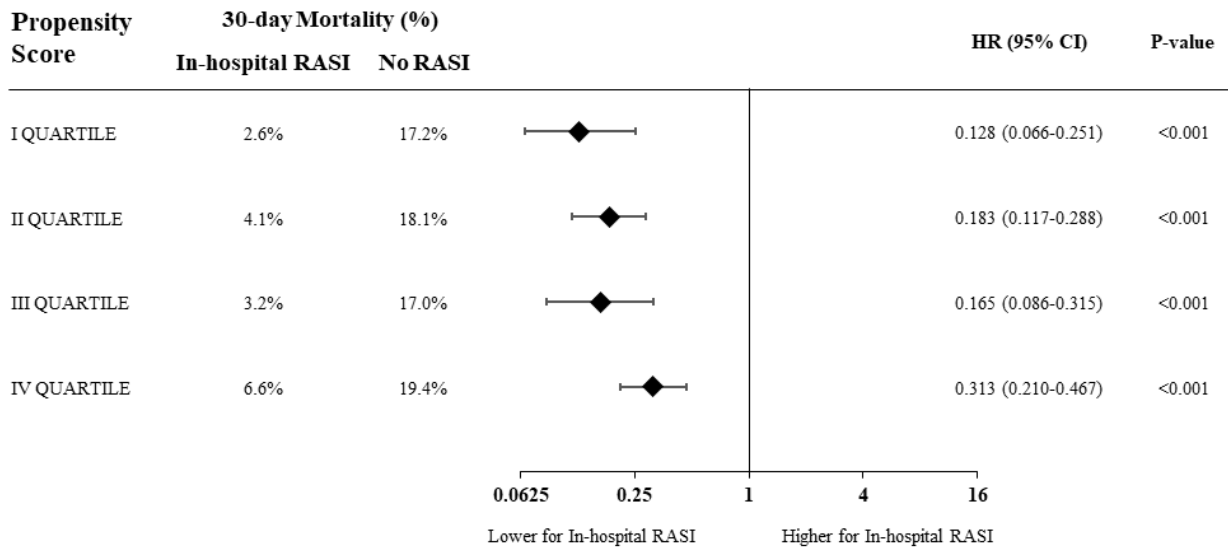

**Table 1S.**Angiographic and procedural characteristics according to chronic RASI therapy at admission.

|                                    | OVERALL<br>POPULATION (N = 3761) |                       |         | YEAR 2019 (N = 2014) |                   |         | YEAR 2020 (N = 1747) |                      |         |
|------------------------------------|----------------------------------|-----------------------|---------|----------------------|-------------------|---------|----------------------|----------------------|---------|
|                                    | RASI<br>(n =2049)                | No RASI<br>(n = 1712) | P value | RASI<br>(n =1072)    | No RASI (n = 942) | P value | RASI<br>(n =977)     | No RASI<br>(n = 770) | P value |
| Radial Access (%)                  | 1447 (70.6)                      | 1271 (74.2)           | 0.014   | 747 (69.7)           | 703 (74.6)        | 0.014   | 700 (71.6)           | 568 (73.8)           | 0.324   |
| <i>Culprit vessel</i>              |                                  |                       | 0.026   |                      |                   | 0.554   |                      |                      | 0.019   |
| Left main – n (%)                  | 42 (2.0)                         | 28 (1.6)              |         | 22 (2.1)             | 15 (1.6)          |         | 20 (2.0)             | 13 (1.7)             |         |
| LAD– n (%)                         | 932 (45.5)                       | 833 (48.7)            |         | 496 (46.3)           | 453 (48.1)        |         | 436 (44.6)           | 380 (49.4)           |         |
| Circumflex – n (%)                 | 268 (13.1)                       | 225 (13.1)            |         | 129 (12.0)           | 128 (13.6)        |         | 139 (14.2)           | 97 (12.6)            |         |
| RCA – n (%)                        | 774 (37.8)                       | 616 (36.0)            |         | 410 (38.2)           | 338 (35.9)        |         | 364 (37.3)           | 278 (36.1)           |         |
| Anterolateral Branch – n (%)       | 6 (0.3)                          | 3 (0.2)               |         | 4 (0.4)              | 2 (0.2)           |         | 2 (0.2)              | 1 (0.1)              |         |
| SVG – n (%)                        | 27 (1.3)                         | 7 (0.4)               |         | 11 (1.0)             | 6 (0.6)           |         | 16 (1.6)             | 1 (0.1)              |         |
| In-stent Thrombosis – n (%)        | 139 (6.8)                        | 42 (2.5)              | <0.001  | 70 (6.5)             | 26 (2.8)          | <0.001  | 69 (7.1)             | 16 (2.1)             | <0.001  |
| Multivessel disease – n (%)        | 1183 (57.7)                      | 996 (58.2)            | 0.474   | 600 (56.0)           | 548 (58.2)        | 0.014   | 583 (59.7)           | 448 (58.2)           | 0.420   |
| Preprocedural TIMI 0 flow – n (%)  | 1310 (63.9)                      | 1127 (65.8)           | 0.225   | 693 (64.6)           | 610 (64.8)        | 0.959   | 617 (63.2)           | 517 (67.1)           | 0.083   |
| Thrombectomy– n (%)                | 293 (14.3)                       | 267 (15.6)            | 0.266   | 151 (14.1)           | 148 (15.7)        | 0.306   | 142 (14.5)           | 119 (15.5)           | 0.592   |
| Stenting– n (%)                    | 1847 (90.1)                      | 1556 (90.9)           | 0.437   | 968 (90.3)           | 862 (91.5)        | 0.347   | 879 (90.0)           | 694 (90.1)           | 0.911   |
| Drug-eluting stent– n (%)          | 1790 (87.4)                      | 1489 (87.0)           | 0.725   | 928 (86.6)           | 813 (86.3)        | 0.864   | 862 (88.2)           | 676 (87.8)           | 0.780   |
| Postprocedural TIMI 3 Flow – n (%) | 1852 (90.4)                      | 1535 (89.7)           | 0.460   | 973 (90.8)           | 856 (90.9)        | 0.935   | 879 (90.0)           | 679 (88.2)           | 0.232   |

|                                          |             |             |       |             |            |       |            |            |       |
|------------------------------------------|-------------|-------------|-------|-------------|------------|-------|------------|------------|-------|
| Gp IIb-IIIa inhibitors/Cangrelor – n (%) | 401 (19.6)  | 305 (17.8)  | 0.170 | 205 (19.1)  | 167 (17.7) | 0.421 | 196 (20.1) | 138 (17.9) | 0.259 |
| Bivalirudin– n (%)                       | 4 (0.2)     | 3 (0.2)     | 0.887 | 4 (0.4)     | 3 (0.3)    | 0.835 | -          | -          | -     |
| Mechanical support – n (%)               | 80 (3.9)    | 87 (5.1)    | 0.081 | 37 (3.5)    | 41 (4.4)   | 0.296 | 43 (4.4)   | 46 (6.0)   | 0.138 |
| <b><i>Additional PCI</i></b>             |             |             | 0.103 |             |            | 0.060 | f          |            | 0.706 |
| During the index procedure – n (%)       | 215 (10.5)  | 145 (8.5)   |       | 107 (10.0)  | 68 (7.2)   |       | 108 (11.1) | 77 (10.0)  |       |
| Staged– n (%)                            | 194 (9.5)   | 172 (10.0)  |       | 99 (9.2)    | 101 (10.7) |       | 95 (9.7)   | 71 (9.2)   |       |
| DAPT therapy – n (%)                     | 2027 (98.9) | 1690 (98.7) | 0.548 | 1063 (99.2) | 930 (98.7) | 0.338 | 964 (98.7) | 760 (98.7) | 0.954 |

TIMI = Thrombolysis in Myocardial Infarction; DAPT = Dual Antiplatelet Therapy

**Table 2S.** Baseline demographic and clinical characteristics according to in-hospital RASI therapy.

|                                         | OVERALL POPULATION<br>(N = 3812) |                       |         | YEAR 2019 (N = 2038) |                       |         | YEAR 2020 (N = 1774) |                      |         |
|-----------------------------------------|----------------------------------|-----------------------|---------|----------------------|-----------------------|---------|----------------------|----------------------|---------|
|                                         | RASI<br>(n =2049)                | No RASI<br>(n = 1763) | P value | RASI<br>(n =1034)    | No RASI<br>(n = 1004) | P value | RASI<br>(n =1015)    | No RASI<br>(n = 759) | P value |
| Radial Access (%)                       | 1631 (79.6)                      | 1109 (62.9)           | <0.001  | 823 (79.6)           | 638 (63.5)            | <0.001  | 808 (79.6)           | 471 (62.1)           | <0.001  |
| <b><i>Culprit vessel</i></b>            |                                  |                       | <0.001  |                      |                       | 0.308   |                      |                      | <0.001  |
| Left main – n (%)                       | 22 (1.1)                         | 49 (2.8)              |         | 15 (1.5)             | 22 (2.2)              |         | 7 (0.7)              | 27 (3.6)             |         |
| Left Anterior Descending Artery – n (%) | 975 (47.6)                       | 805 (45.7)            |         | 498 (48.2)           | 459 (45.7)            |         | 477 (47.0)           | 346 (45.6)           |         |
| Circumflex – n (%)                      | 289 (14.1)                       | 214 (12.1)            |         | 126 (12.2)           | 135 (13.4)            |         | 163 (16.1)           | 79 (10.4)            |         |
| Right Coronary Artery – n (%)           | 736 (35.9)                       | 679 (38.5)            |         | 380 (36.8)           | 380 (37.8)            |         | 356 (35.1)           | 299 (39.4)           |         |
| Anterolateral Branch – n (%)            | 7 (0.3)                          | 2 (0.1)               |         | 5 (0.5)              | 1 (0.1)               |         | 2 (0.2)              | 1 (0.1)              |         |
| SVG – n (%)                             | 20 (1.0)                         | 14 (0.8)              |         | 10 (1.0)             | 7 (0.7)               |         | 10 (1.0)             | 7 (0.9)              |         |
| In-stentThrombosis – n (%)              | 116 (5.7)                        | 71 (4.0)              | 0.020   | 58 (5.6)             | 41 (4.1)              | 0.109   | 58 (5.7)             | 30 (4.0)             | 0.091   |
| Multivesseldisease – n (%)              | 1164 (56.8)                      | 1031 (58.5)           | 0.049   | 571 (55.2)           | 583 (58.1)            | 0.022   | 593 (58.4)           | 448 (59.0)           | 0.760   |
| Preprocedural TIMI 0 flow – n (%)       | 1322 (64.5)                      | 1146 (65.0)           | 0.755   | 672 (65.0)           | 644 (64.1)            | 0.689   | 650 (64.0)           | 502 (66.1)           | 0.359   |
| Thrombectomy– n (%)                     | 344 (16.8)                       | 216 (12.3)            | <0.001  | 177 (17.1)           | 122 (12.2)            | 0.002   | 167 (16.5)           | 94 (12.4)            | 0.017   |
| Stenting– n (%)                         | 1864 (91.0)                      | 1582 (89.7)           | 0.196   | 943 (91.2)           | 906 (90.2)            | 0.455   | 921 (90.7)           | 676 (89.1)           | 0.244   |
| Drug-eluting stent– n (%)               | 1851 (90.3)                      | 1470 (83.4)           | <0.001  | 931 (90.0)           | 829 (82.6)            | <0.001  | 920 (90.6)           | 641 (84.5)           | <0.001  |
| Postprocedural TIMI 3 Flow – n (%)      | 1890 (92.2)                      | 1547 (87.7)           | <0.001  | 956 (92.5)           | 896 (89.2)            | 0.012   | 934 (92.0)           | 651 (85.8)           | <0.001  |

|                                          |             |             |        |             |            |       |             |            |       |
|------------------------------------------|-------------|-------------|--------|-------------|------------|-------|-------------|------------|-------|
| Gp IIb-IIIa inhibitors/Cangrelor – n (%) | 393 (19.2)  | 319 (18.1)  | 0.391  | 188 (18.2)  | 185 (18.4) | 0.887 | 205 (20.2)  | 134 (17.7) | 0.178 |
| Bivalirudin– n (%)                       | 3 (0.1)     | 8 (0.5)     | 0.078  | 3 (0.3)     | 6 (0.6)    | 0.295 | 0 (0.0)     | 2 (0.3)    | 0.102 |
| Mechanical support – n (%)               | 66 (3.2)    | 101 (5.7)   | <0.001 | 28 (2.7)    | 50 (5.0)   | 0.008 | 38 (3.7)    | 51 (6.7)   | 0.005 |
| <b><i>Additional PCI</i></b>             |             |             | 0.119  |             |            | 0.094 |             |            | 0.228 |
| During the index procedure – n (%)       | 209 (10.2)  | 183 (10.4)  |        | 87 (8.4)    | 104 (10.4) |       | 122 (12.0)  | 79 (10.4)  |       |
| Staged– n (%)                            | 216 (10.5)  | 151 (8.6)   |        | 113 (10.9)  | 87 (8.7)   |       | 103 (10.1)  | 64 (8.4)   |       |
| DAPT therapy – n (%)                     | 2034 (99.3) | 1734 (98.4) | 0.009  | 1031 (99.7) | 986 (98.2) | 0.001 | 1003 (98.8) | 748 (98.6) | 0.623 |

TIMI = Thrombolysis in Myocardial Infarction; DAPT = Dual Antiplatelet Therapy
